# Supplementary material for: Effect of timing of hip extension assistance during loaded walking with a soft exosuit
Source: Springer Nature journal article supplement (doi:10.1186/s12984-016-0196-8), 2016-10-03
Supplement: MOESM1 [file 10806956]

## Additional files

### Additional file 1: Table S1.

**Table S1.** Questionnaire results indicated participants' perceptions on assistive conditions on a visual analogue scale from 0 to 10. Q1: "How comfortable was this active condition?" Zero indicates unbearable and 10 indicates extremely comfortable. Q2: "How did you perceive the effect of the exosuit?" Zero indicates walking is impossible and 10 indicates walking is effortless. Early-start-early-peak (ESEP), early-start-late-peak (ESLP), late-start-early-peak (LSEP), late-start-late-peak (LSLP).

|           | Training Day |            |            |            | Testing Day |            |            |            |
|-----------|--------------|------------|------------|------------|-------------|------------|------------|------------|
|           | ESEP         | ESLP       | LSEP       | LSLP       | ESEP        | ESLP       | LSEP       | LSLP       |
| <b>Q1</b> | 6.0 ± 0.57   | 6.5 ± 0.54 | 6.7 ± 0.24 | 5.6 ± 0.28 | 6.1 ± 0.31  | 5.5 ± 0.36 | 6.0 ± 0.29 | 6.2 ± 0.28 |
| <b>Q2</b> | 5.3 ± 0.68   | 5.9 ± 0.55 | 5.9 ± 0.57 | 5.1 ± 0.41 | 5.7 ± 0.46  | 5.1 ± 0.44 | 5.9 ± 0.41 | 5.6 ± 0.50 |

### Additional file 1: Table S2.

**Table S2.** Spatiotemporal parameters. Early-start-early-peak (ESEP), early-start-late-peak (ESLP), late-start-early-peak (LSEP), late-start-late-peak (LSLP). Data are means ± SEM.

|                  | Stride length (m) | Stride Frequency (Hz) | Stance Time (s) | Swing Time (s) | Duty Factor (%) |
|------------------|-------------------|-----------------------|-----------------|----------------|-----------------|
| <b>Unpowered</b> | 1.528 ± 0.024     | 0.983 ± 0.015         | 0.679 ± 0.011   | 0.340 ± 0.007  | 66.7 ± 0.3      |
| <b>ESEP</b>      | 1.512 ± 0.021     | 0.993 ± 0.013         | 0.671 ± 0.008   | 0.337 ± 0.006  | 66.5 ± 0.2      |
| <b>ESLP</b>      | 1.520 ± 0.023     | 0.989 ± 0.014         | 0.674 ± 0.009   | 0.339 ± 0.006  | 66.5 ± 0.2      |
| <b>LSEP</b>      | 1.512 ± 0.020     | 0.993 ± 0.013         | 0.672 ± 0.008   | 0.336 ± 0.007  | 66.7 ± 0.3      |
| <b>LSLP</b>      | 1.519 ± 0.023     | 0.989 ± 0.015         | 0.678 ± 0.010   | 0.335 ± 0.006  | 66.9 ± 0.3      |
